# Supplementary material
Source: MDPI journal article supplement (https://www.mdpi.com/2079-6412/13/4/795)
Supplement: s1 [file s1]

Supplementary Materials

PE

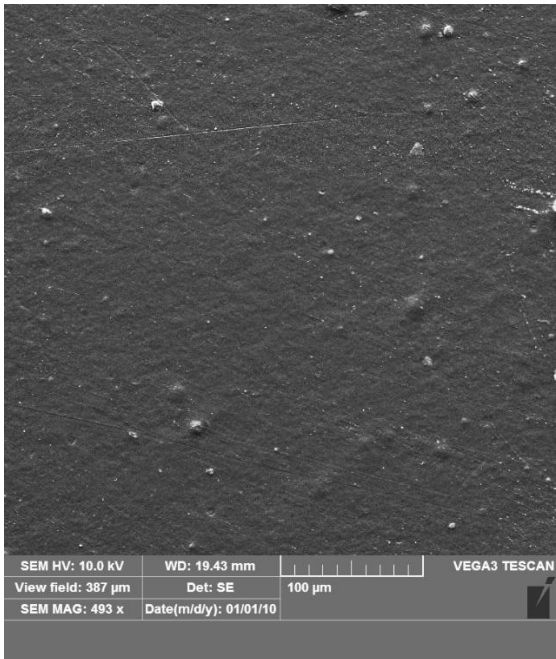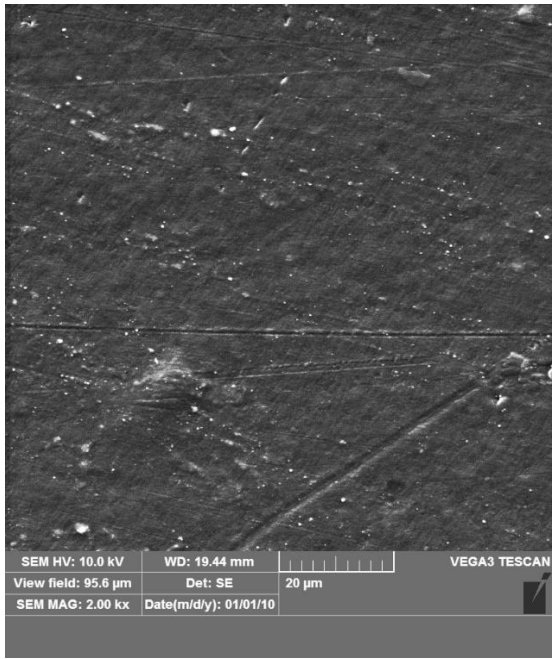

M1

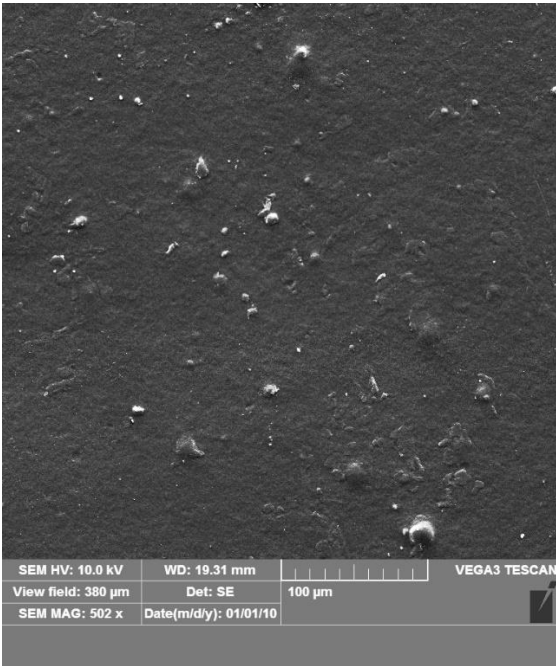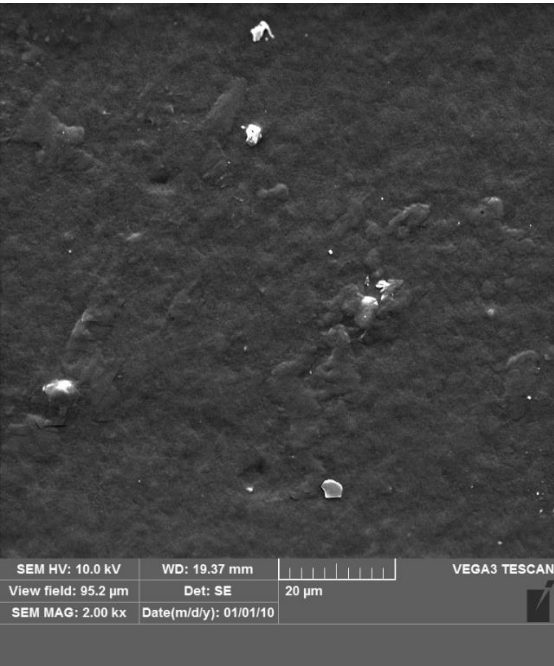

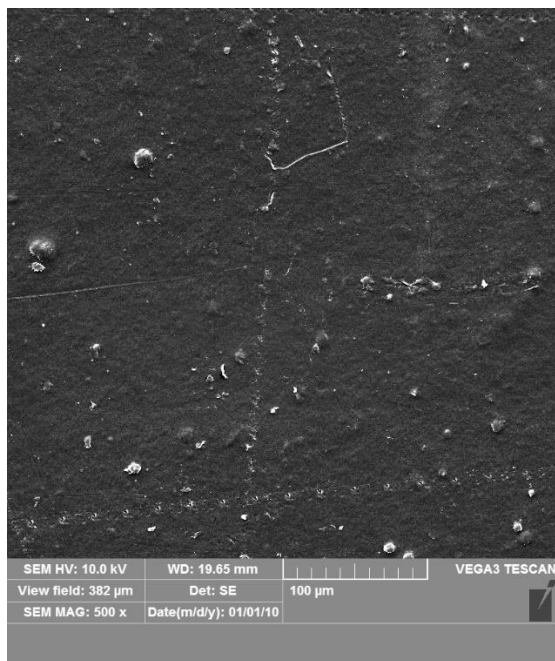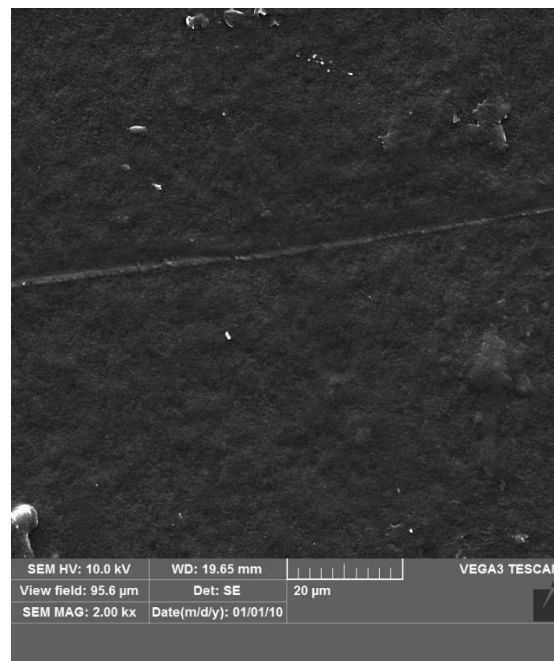

M2

**Figure S1.** The PE film and PE film covered with the active coatings (in 500x and 2000x magnifications).
